# Supplementary material for: Hollow Au/Ag nanostars displaying broad plasmonic resonance and high surface-enhanced Raman sensitivity
Source: Royal Society of Chemistry journal article supplement (doi:10.1039/c5nr02819a), 2015-01-01
Supplement: c5nr02819a1.pdf [file c5nr02819a1.pdf]

## Supplementary Information

# Hollow Ag/Au Nanostars Displaying Broad Surface-Enhanced Raman Sensitivity

*Adianez Garcia-Leis,<sup>1</sup> Armida Torreggiani,<sup>2</sup> Jose Vicente Garcia-Ramos,<sup>1</sup> and Santiago Sanchez-Cortes<sup>1\*</sup>*

<sup>1</sup> Instituto de Estructura de la Materia. IEM-CSIC, Serrano 121, 28006 Madrid, Spain.

<sup>2</sup> ISOF. Consiglio Nazionale delle Ricerche, Via P. Gobetti 101, 40129 Bologna, Italy.

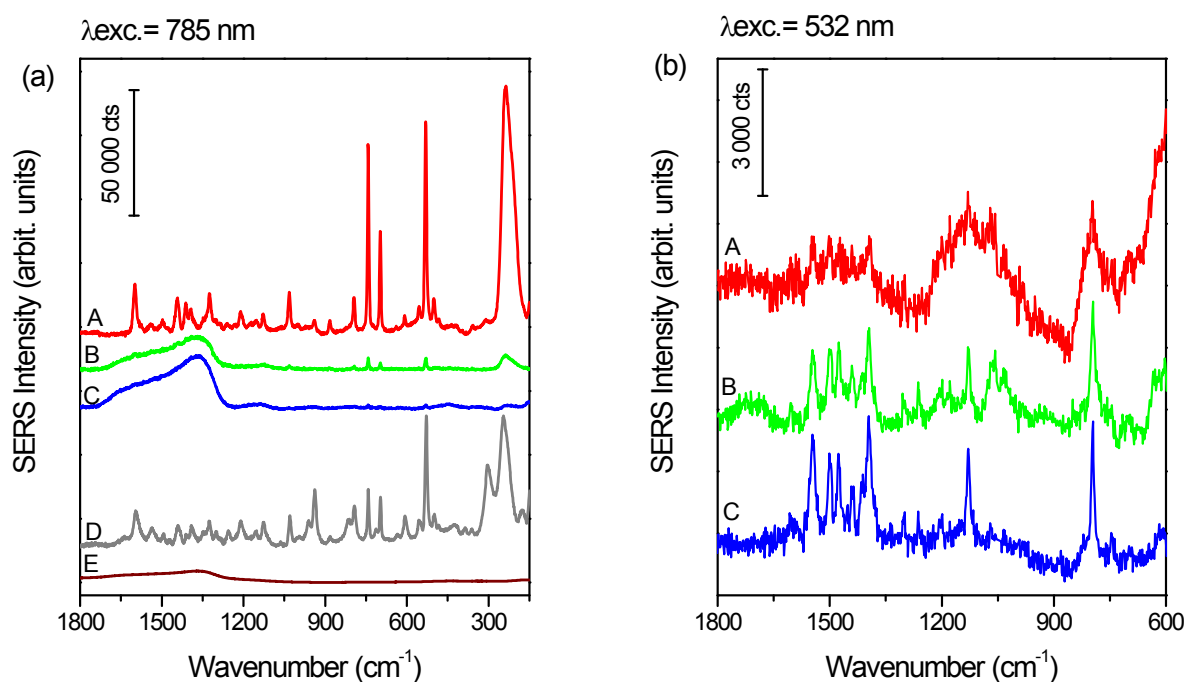

**Figure S1:** SERS spectra of ThT (1 μM) on different colloids substrates at two different excitation wavelengths: a) 785 nm and b) 532 nm.
